# Supplementary material
Source: PubMed Central journal article supplement (PMC7190303)
Supplement: mmc1.pdf [file mmc1.pdf]

# THE LANCET

## Supplementary appendix

This appendix formed part of the original submission and has been peer reviewed.  
We post it as supplied by the authors.

Supplement to: Wang Y, Zhang D, Du G, et al. Remdesivir in adults with severe COVID-19: a randomised, double-blind, placebo-controlled, multicentre trial. *Lancet* 2020; published online April 29. [http://dx.doi.org/10.1016/S0140-6736\(20\)31022-9](http://dx.doi.org/10.1016/S0140-6736(20)31022-9).

1 **Appendix**

2 **Table of Contents**

3 **Table S1.** Outcomes in the PP population.....2

4 **Table S2.** Accumulated rate of undetectable viral RNA in upper respiratory tract specimens  
5 in ITT population. ....4

6 **Figure S1.** Kaplan Meier plot of time-to-clinical improvement at day 28 in the PP population.  
7 .....5

8 **Figure S2.** Kaplan Meier plot of time-to-clinical improvement by duration of illness ( $\leq 10$   
9 days [Panel A] vs  $> 10$  days [Panel B]) in the intention-to-treat population.....6

10 **Figure S3.** Kaplan Meier plot of time-to-clinical improvement (defined as one category  
11 decline) in the ITT population. ....7

12 **Figure S4.** Kaplan Meier of time-to-clinical deterioration (defined as one category increase  
13 or death) in the intention-to-treat population. ....8

14 **Figure S5.** Proportional distribution of primary endpoint categories at day1, 7, 14 and 28 in  
15 the intention-to-treat population .....9

16 **Figure S7.** SARS-CoV-2 viral RNA load over time from baseline by qPCR on the upper  
17 respiratory tract swabs (viral positive population) by duration of illness ( $\leq 10$  days [Panel A]  
18 vs  $> 10$  days [Panel B]) in the viral positive population..... 10

19  
20

21 **Table S1.** Outcomes in the PP population.

| Characteristics                                             | Total (n = 226)     | Remdesivir group (n = 150) | Control group (n = 76) | Difference §         |
|-------------------------------------------------------------|---------------------|----------------------------|------------------------|----------------------|
| TTCI                                                        | 22.0 (14.0 to 28.0) | 21.0 (13.0 to 28.0)        | 23.0 (15.0 to 28.0)    | 1.27 (0.89 to 1.80)† |
| Day 28 mortality, n (%)                                     | 28 (12.4)           | 19 (12.7)                  | 9 (11.8)               | 0.8 (-8.2 to 9.8)    |
| Early (≤10 days of symptom onset)                           | 14/115 (12.2)       | 8/69 (11.6)                | 6/46 (13.0)            | -1.4 (-13.8 to 10.9) |
| Late (> 10 days of symptom onset)                           | 14/111 (12.6)       | 11/81 (13.6)               | 3/30 (10.0)            | 3.6 (-9.5 to 16.7)   |
| Clinical improvement proportions                            |                     |                            |                        |                      |
| Day 7, n (%)                                                | 6 (2.7)             | 4 (2.7)                    | 2 (2.6)                | 0.0 (-4.4 to 4.5)    |
| Day 14, n (%)                                               | 58 (25.7)           | 41 (27.3)                  | 17 (22.4)              | 5.0 (-6.8 to 16.7)   |
| Day 28, n (%)                                               | 145 (64.2)          | 101 (67.3)                 | 44 (57.9)              | 9.4 (-4.0 to 22.8)   |
| IMV duration (days) &                                       | 8.0 (5.0 to 17.0)   | 7.0 (3.0 to 13.5)          | 16.0 (8.0 to 21.0)     | -8.0 (-19.0 to 0.0)  |
| IMV duration in survivors (days) &                          | 19.0 (17.0 to 42.0) | 12.0 (5.0 to 19.0)         | 42.0 (17.0 to 46.0)    | -25.0 (-41.0 to 2.0) |
| IMV duration in non-survivors (days) &                      | 7.5 (4.5 to 15.5)   | 7.0 (2.0 to 11.0)          | 11.5 (6.0 to 16.0)     | -4.0 (-13.0 to 3.0)  |
| Length of oxygen support (days)                             | 20.0 (12.0 to 30.5) | 19.0 (11.0 to 30.0)        | 21.0 (14.0 to 31.0)    | -3.0 (-6.0 to 1.0)   |
| Hospital length of stay (days)                              | 25.0 (17.0 to 37.0) | 25.0 (17.0 to 38.0)        | 25.0 (18.0 to 36.0)    | 0.0 (-4.0 to 4.0)    |
| Days from randomization to discharge (days)                 | 21.0 (13.0 to 31.0) | 21.0 (13.0 to 32.0)        | 21.0 (14.0 to 29.0)    | 0.0 (-4.0 to 3.0)    |
| Days from randomization to death (days)                     | 11.0 (7.0 to 19.0)  | 11.0 (7.0 to 19.0)         | 12.0 (7.0 to 18.0)     | -1.0 (-7.0 to 7.0)   |
| Six-category scale at day 7                                 |                     |                            |                        | 0.71 (0.41 to 1.21)* |
| 1 Discharge (alive)                                         | 6/225 (2.7)         | 4/149 (2.7)                | 2 (2.6)                |                      |
| 2 Hospitalization, not requiring supplemental oxygen, n (%) | 37/225 (16.4)       | 21/149 (14.1)              | 16 (21.1)              |                      |
| 3 Hospitalization, requiring supplemental oxygen, n (%)     | 129/225 (57.3)      | 86/149 (57.7)              | 43 (56.6)              |                      |
| 4 Hospitalization, requiring HFNC and/or non-IMV, n (%)     | 34/225 (15.1)       | 26/149 (17.4)              | 8 (10.5)               |                      |
| 5 Hospitalization, requiring ECMO and/or IMV, n (%)         | 9/225 (4.0)         | 5/149 (3.4)                | 4 (5.3)                |                      |
| 6 Death                                                     | 10/225 (4.4)        | 7/149 (4.7)                | 3 (3.9)                |                      |
| Six-category scale at day 14                                |                     |                            |                        | 1.31 (0.80 to 2.17)* |
| 1 Discharge (alive)                                         | 55/225 (24.4)       | 38/149 (25.5)              | 17 (22.4)              |                      |
| 2 Hospitalization, not requiring supplemental oxygen, n (%) | 31/225 (13.8)       | 21/149 (14.1)              | 10 (13.2)              |                      |
| 3 Hospitalization, requiring supplemental oxygen, n (%)     | 89/225 (39.6)       | 61/149 (40.9)              | 28 (36.8)              |                      |
| 4 Hospitalization, requiring HFNC and/or non-IMV, n (%)     | 21/225 (9.3)        | 13/149 (8.7)               | 8 (10.5)               |                      |
| 5 Hospitalization, requiring ECMO and/or IMV, n (%)         | 11/225 (4.9)        | 4/149 (2.7)                | 7 (9.2)                |                      |

|                                                             |                |               |              |                      |
|-------------------------------------------------------------|----------------|---------------|--------------|----------------------|
| 6 Death                                                     | 18/225 (8.0)   | 12/149 (8.1)  | 6 (7.9)      | 1.19 (0.69 to 2.05)* |
| Six-category scale at day 28                                |                |               |              |                      |
| 1 Discharge (alive)                                         | 134/220 (60.9) | 90/145 (62.1) | 44/75 (58.7) |                      |
| 2 Hospitalization, not requiring supplemental oxygen, n (%) | 18/220 (8.2)   | 14/145 (9.7)  | 4/75 (5.3)   |                      |
| 3 Hospitalization, requiring supplemental oxygen, n (%)     | 31/220 (14.1)  | 18/145 (12.4) | 13/75 (17.3) |                      |
| 4 Hospitalization, requiring HFNC and/or non-IMV, n (%)     | 4/220 (1.8)    | 2/145 (1.4)   | 2/75 (2.7)   |                      |
| 5 Hospitalization, requiring ECMO and/or IMV, n (%)         | 5/220 (2.3)    | 2/145 (1.4)   | 3/75 (4.0)   |                      |
| 6 Death                                                     | 28/220 (12.7)  | 19/145 (13.1) | 9/75 (12.0)  |                      |

22 \* Calculated by ordinal logistic regression model.

23 Abbreviation: TICI=time-to-clinical improvement; HFNC = high-flow nasal cannula for oxygen  
 24 therapy; IMV = invasive mechanical ventilation; ECMO = extracorporeal membrane oxygenation.  
 25 & In survivors, 2 patients were in remdesivir group, 3 cases in control group; In non-survivors, 10  
 26 patients were in remdesivir group, 6 cases in control group.

27 § Differences were expressed as rate differences or Hodges-Lehmann estimator and 95% confidence  
 28 intervals.

29 † The hazard ratio was estimated by COX proportional risk model.

30

31

32 **Table S2.** Accumulated rate of undetectable viral RNA in upper respiratory tract specimens in viral  
 33 positive population.

| Study day         | Total (n = 196)  | Remdesivir group (n = 131) | Control group (n = 65) | Difference §         |
|-------------------|------------------|----------------------------|------------------------|----------------------|
| Baseline          | 37/196 ( 18.9%)  | 24/131 ( 18.3%)            | 13/65 ( 20.0%)         | -1.7 (-13.4 to 10.1) |
| Day 3, n (%)      | 56/196 ( 28.6%)  | 37/131 ( 28.2%)            | 19/65 ( 29.2%)         | -1.0 (-14.5 to 12.5) |
| Day 5             | 78/196 ( 39.8%)  | 53/131 ( 40.5%)            | 25/65 ( 38.5%)         | 2.0 (-12.5 to 16.5)  |
| Day 7             | 98/196 ( 50.0%)  | 66/131 ( 50.4%)            | 32/65 ( 49.2%)         | 1.2 (-13.7 to 16.0)  |
| Day 10            | 127/196 ( 64.8%) | 82/131 ( 62.6%)            | 45/65 ( 69.2%)         | -6.6 (-20.6 to 7.3)  |
| Day 14            | 142/196 ( 72.4%) | 93/131 ( 71.0%)            | 49/65 ( 75.4%)         | -4.4 (-17.4 to 8.6)  |
| Day 21            | 151/196 ( 77.0%) | 98/131 ( 74.8%)            | 53/65 ( 81.5%)         | -6.7 (-18.7 to 5.3)  |
| Day 28            | 153/196 ( 78.1%) | 99/131 ( 75.6%)            | 54/65 ( 83.1%)         | -7.5 (-19.2 to 4.2)  |
| Survivors, n      | 167              | 112                        | 55                     |                      |
| Baseline          | 33/167 ( 19.8%)  | 21/112 ( 18.8%)            | 12/55 ( 21.8%)         | -3.1 (-16.2 to 10.0) |
| Day 3, n (%)      | 49/167 ( 29.3%)  | 32/112 ( 28.6%)            | 17/55 ( 30.9%)         | -2.3 (-17.1 to 12.5) |
| Day 5             | 70/167 ( 41.9%)  | 47/112 ( 42.0%)            | 23/55 ( 41.8%)         | 0.1 (-15.8 to 16.1)  |
| Day 7             | 89/167 ( 53.3%)  | 59/112 ( 52.7%)            | 30/55 ( 54.5%)         | -1.9 (-18.0 to 14.2) |
| Day 10            | 117/167 ( 70.1%) | 75/112 ( 67.0%)            | 42/55 ( 76.4%)         | -9.4 (-23.6 to 4.8)  |
| Day 14            | 131/167 ( 78.4%) | 85/112 ( 75.9%)            | 46/55 ( 83.6%)         | -7.7 (-20.3 to 4.8)  |
| Day 21            | 138/167 ( 82.6%) | 89/112 ( 79.5%)            | 49/55 ( 89.1%)         | -9.6 (-20.8 to 1.5)  |
| Day 28            | 139/167 ( 83.2%) | 90/112 ( 80.4%)            | 49/55 ( 89.1%)         | -8.7 (-19.8 to 2.3)  |
| Non-survivors, n* | 29               | 19                         | 10                     |                      |
| Baseline          | 4/29 ( 13.8%)    | 3/19 ( 15.8%)              | 1/10 ( 10.0%)          | 5.8 (-19.0 to 30.6)  |
| Day 3, n (%)      | 7/29 ( 24.1%)    | 5/19 ( 26.3%)              | 2/10 ( 20.0%)          | 6.3 (-25.4 to 38.0)  |
| Day 5             | 8/29 ( 27.6%)    | 6/19 ( 31.6%)              | 2/10 ( 20.0%)          | 11.6 (-20.8 to 44.0) |
| Day 7             | 9/29 ( 31.0%)    | 7/19 ( 36.8%)              | 2/10 ( 20.0%)          | 16.8 (-16.1 to 49.8) |
| Day 10            | 10/29 ( 34.5%)   | 7/19 ( 36.8%)              | 3/10 ( 30.0%)          | 6.8 (-28.9 to 42.6)  |
| Day 14            | 11/29 ( 37.9%)   | 8/19 ( 42.1%)              | 3/10 ( 30.0%)          | 12.1 (-23.9 to 48.2) |
| Day 21            | 13/29 ( 44.8%)   | 9/19 ( 47.4%)              | 4/10 ( 40.0%)          | 7.4 (-30.4 to 45.1)  |
| Day 28            | 14/29 ( 48.3%)   | 9/19 ( 47.4%)              | 5/10 ( 50.0%)          | -2.6 (-40.9 to 35.6) |

34 \* Totally, 35 patients died during the hospitalization, otherwise there were 32 fatal cases until day 28;  
 35 Respiratory specimens of 27 patients in remdesivir group and 13 patients in control group were not  
 36 collected because safety of medical care workers during aerosol generating procedures cannot be  
 37 guaranteed in one study site

38

39 **Figure S1.** Kaplan Meier plot of time-to-clinical improvement at day 28 in the PP population.

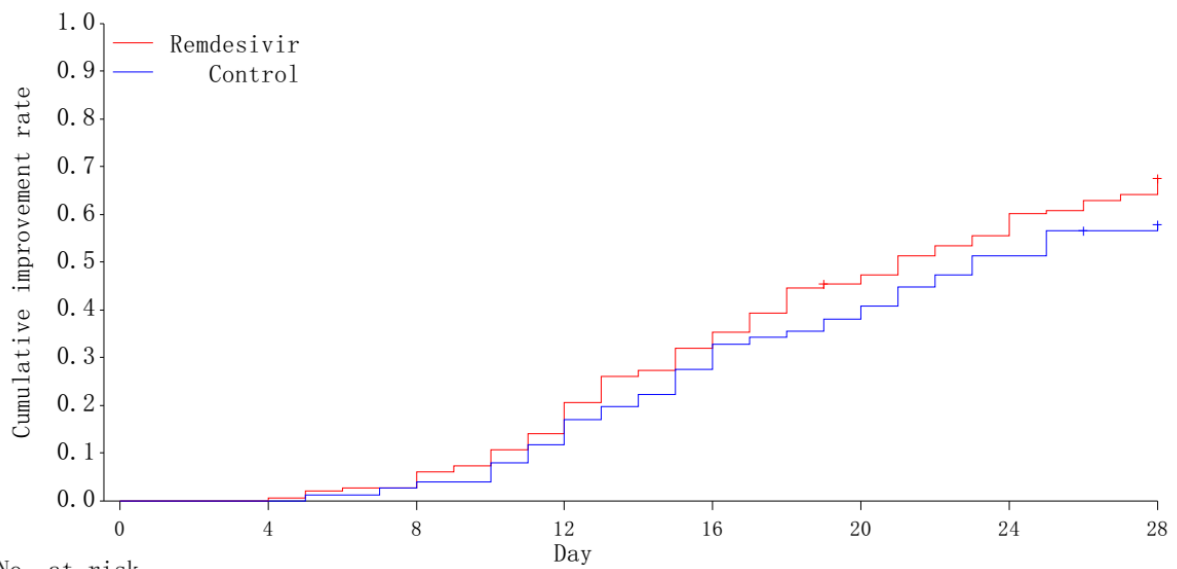

No. at risk

|            |     |     |     |     |    |    |    |    |
|------------|-----|-----|-----|-----|----|----|----|----|
| Remdesivir | 150 | 149 | 141 | 119 | 97 | 78 | 59 | 25 |
| Control    | 76  | 76  | 73  | 63  | 51 | 45 | 37 | 17 |

40

41 **Note.** Hazard ratio (HR) for clinical improvement, 1.27; 95% confidence interval [CI], 0.89 to 1.80.

42 **Figure S2.** Kaplan Meier plot of time-to-clinical improvement by duration of illness ( $\leq 10$  days  
 43 [Panel A] vs  $> 10$  days [Panel B]) in the intention-to-treat population.

44  
 45  
 46 A

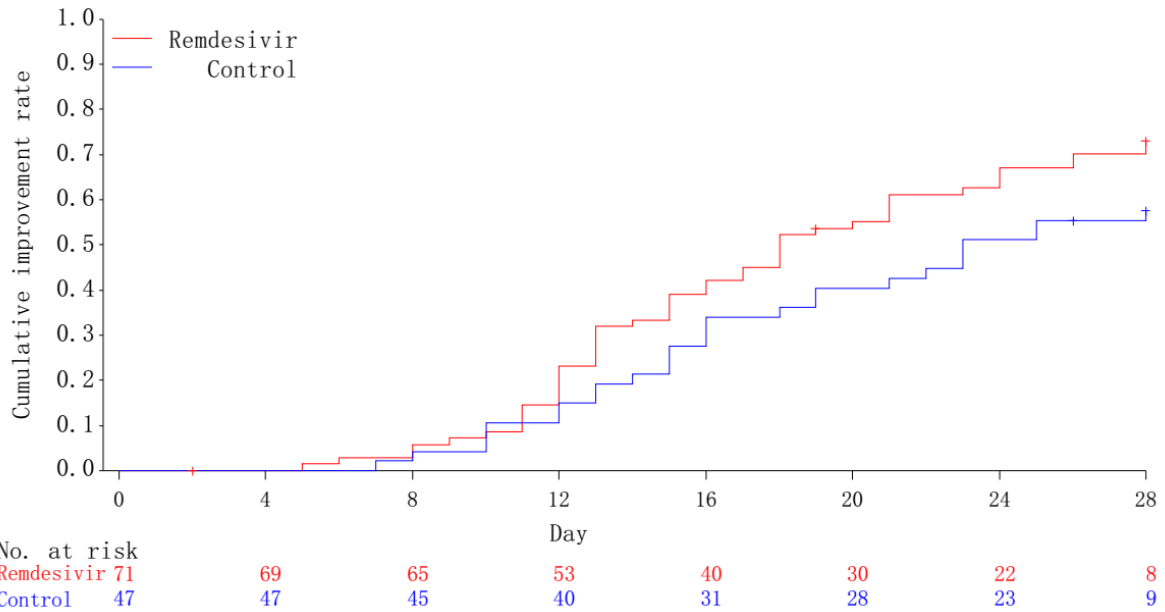

47  
 48 B

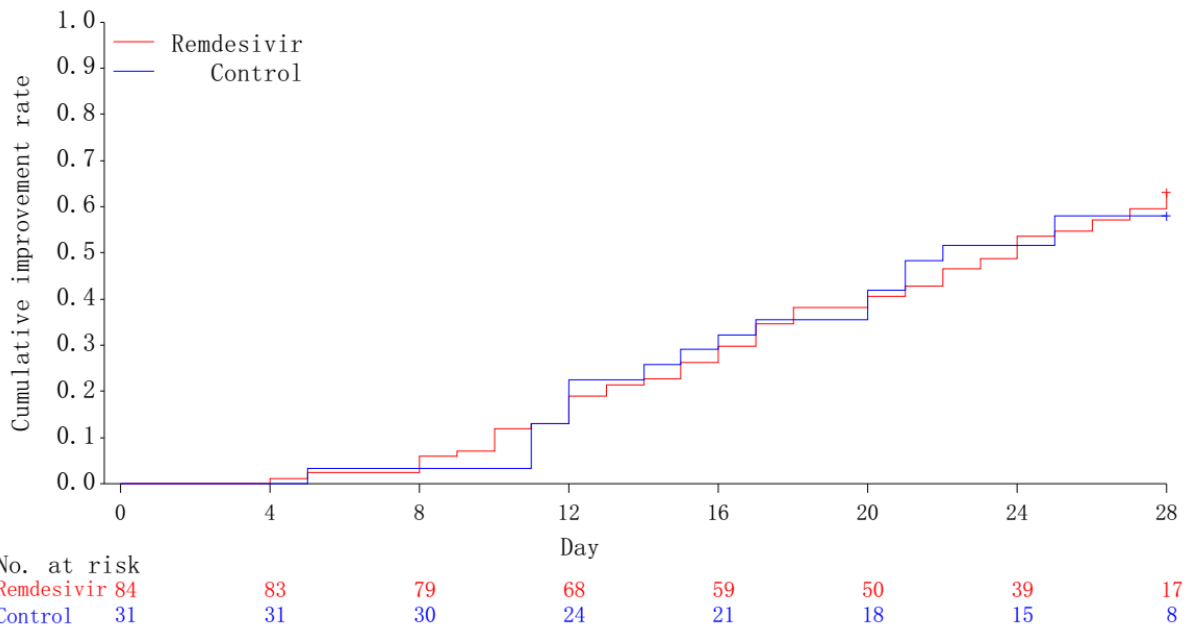

49

50 **Note.** (A) In early treatment group ( $\leq 10$  days), median TTCI 18.0 days (remdesivir) vs. 23 days  
 51 (control); hazard ratio (HR) for clinical improvement, 1.52; 95% confidence interval [CI], 0.95 to  
 52 2.43; and (B) in late treatment group ( $>10$  days), median TTCI 23.0 days (remdesivir) vs. 24 days  
 53 (control); HR for clinical improvement, 1.07; 95% CI, 0.63 to 1.83.

54 **Figure S3.** Kaplan Meier plot of time-to-clinical improvement (defined as one category decline) in  
55 the ITT population.

56

57

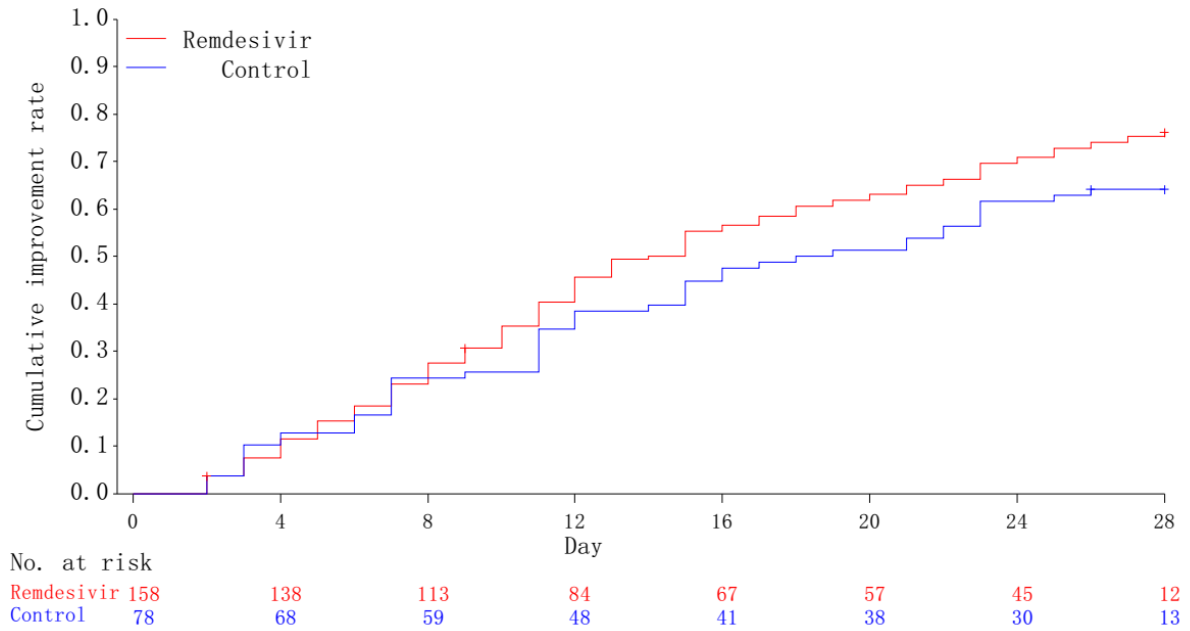

58

59 **Note.** HR for clinical improvement, 1.34; 95% CI, 0.96 to 1.86.



60 **Figure S4.** Kaplan Meier of time-to-clinical deterioration (defined as one category increase or death)  
61 in the intention-to-treat population.

62  
63

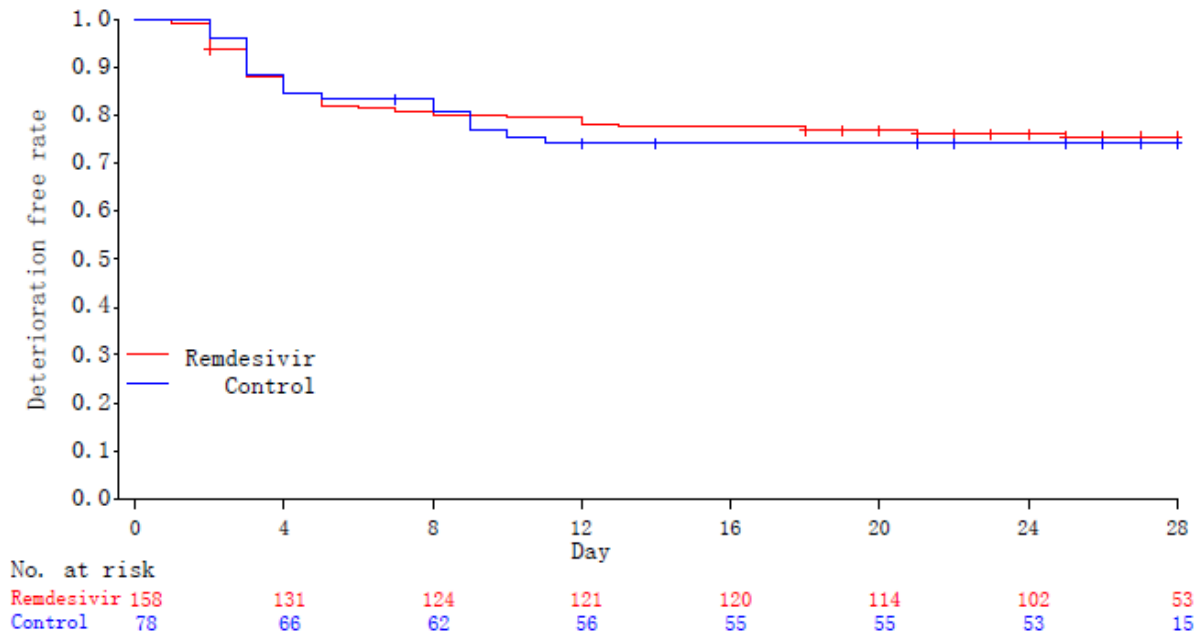

64  
65  
66  
67

**Note.** Hazard ratio for clinical deterioration, 0.95; 95% CI, 0.55 to 1.64.

68 **Figure S5.** Proportional distribution of primary endpoint categories at day1, 7, 14 and 28 in the  
 69 intention-to-treat population  
 70

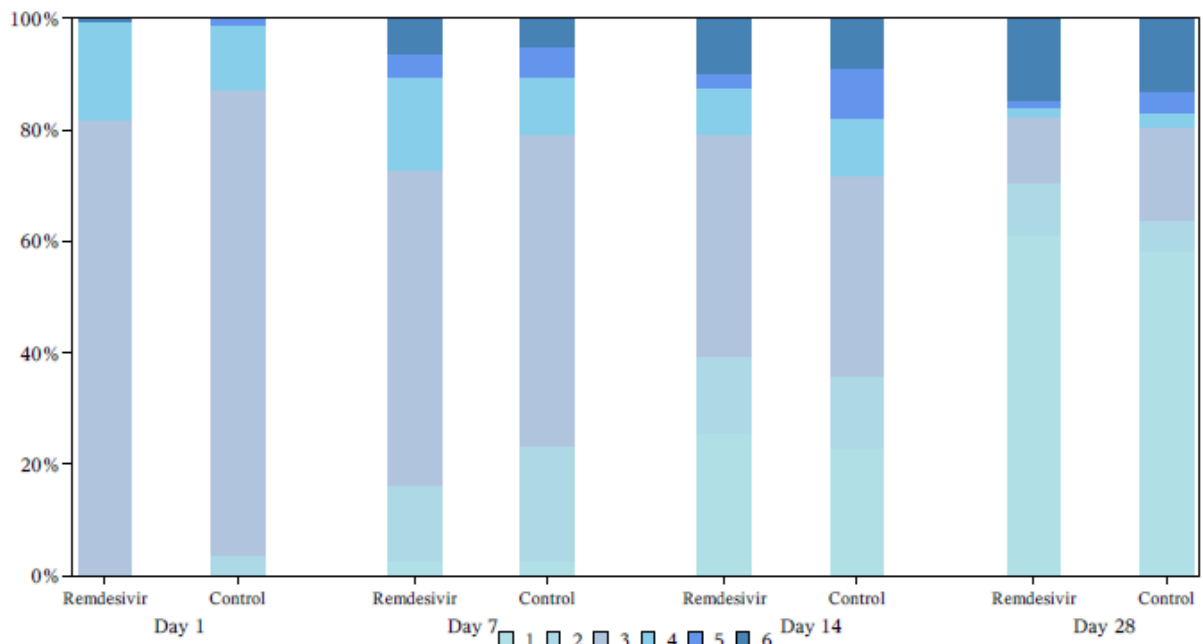

71  
 72 Proportion of severe outcomes according to 6-category ordinal scale that ranges from 1 (discharged  
 73 with normal activity) to 6 (death). 1 Hospital discharge (alive); 2 Hospitalized, not requiring  
 74 supplemental oxygen; 3 Hospitalized, requiring supplemental oxygen; 4 Hospitalized, requiring high-  
 75 flow nasal oxygen (HFNC)and/or non-invasive mechanical ventilation (IMV); 5 Hospitalized,  
 76 requiring ECMO and/or IMV; 6 Death.

77  
 78

79 **Figure S6.** SARS-CoV-2 viral RNA load over time from baseline by qPCR on the upper respiratory  
 80 tract swabs (viral positive population) by duration of illness ( $\leq 10$  days [Panel A] vs  $> 10$  days [Panel  
 81 B]) in the viral positive population.

82  
 83 A

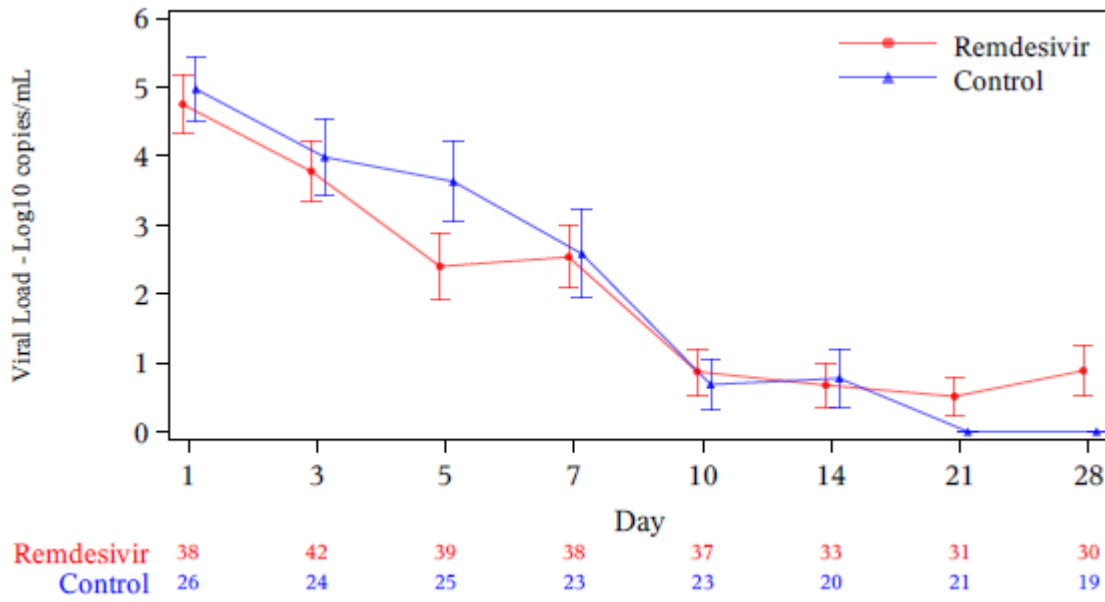

84  
 85  
 86 B

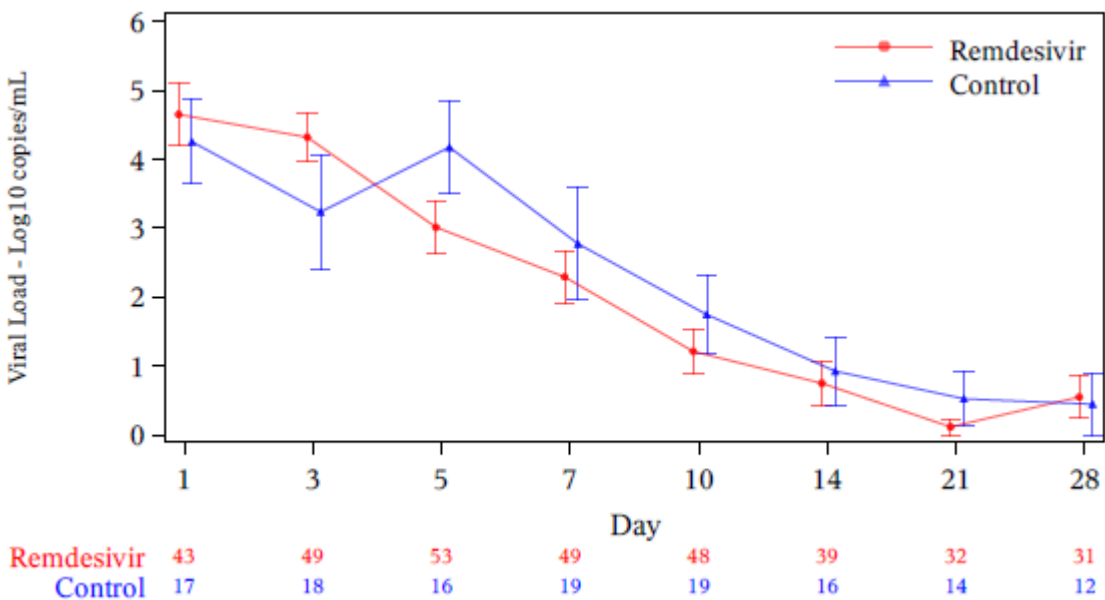

87  
 88 **Note.** Based on Wilcoxon rank sum test at each visit, (A) In early treatment group ( $\leq 10$  days), no  
 89 significant statistical difference between two treatment group, and (B) in late treatment group ( $>10$   
 90 days), no significant statistical difference between two treatment group.
